# Supplementary material for: Comparison of perioperative outcomes among non-small cell lung cancer patients with neoadjuvant immune checkpoint inhibitor plus chemotherapy, EGFR-TKI, and chemotherapy alone: a real-world evidence study
Source: PubMed Central journal article supplement — Transl Lung Cancer Res. 2022 Jul;11(7):1468–78. doi: 10.21037/tlcr-22-476 (PMC9359956; doi:10.21037/tlcr-22-476), 2022-07
Supplement: tlcr-11-07-1468-dss.pdf [file tlcr-11-07-1468-dss.pdf]

## Data Sharing Statement

|                     |                                                                                                                                                     |                                                                                                                     |
|---------------------|-----------------------------------------------------------------------------------------------------------------------------------------------------|---------------------------------------------------------------------------------------------------------------------|
| <b>Article Info</b> | <a href="https://dx.doi.org/10.21037/tlcr-22-476">https://dx.doi.org/10.21037/tlcr-22-476</a>                                                       |                                                                                                                     |
| <b>Item</b>         | <b>Question</b>                                                                                                                                     | <b>Authors' Response<br/>(place "-" if not applicable)</b>                                                          |
| 1                   | Would you like to share data collected for your study to others?                                                                                    | Yes.                                                                                                                |
| 2                   | If not, would you like to share the reason for your decision?                                                                                       | -                                                                                                                   |
| 3                   | What data in particular will be shared?                                                                                                             | The clinicopathological characteristics and assessment outcomes of surgical resection of all the enrolled patients. |
| 4                   | Any other documents will be shared? Such as study protocol, statistical analysis plan, informed consent form, clinical study report, analytic code. | Statistical analysis plan, clinical study report, analytic code.                                                    |
| 5                   | When will data availability begin?                                                                                                                  | From the publication date.                                                                                          |
| 6                   | When will data availability end?                                                                                                                    | Two years within the publication date.                                                                              |
| 7                   | To whom will you share the data?                                                                                                                    | Thoracic surgeons, medical oncologists, pulmonologists or radiologists who are interested in neoadjuvant treatment. |
| 8                   | For what type of analysis or purpose?                                                                                                               | For analysis to evaluate clinical feasibility or perioperative outcomes of neoadjuvant treatment.                   |
| 9                   | How or where can the data/documents be obtained?                                                                                                    | Emails could be sent to: chenthoracic@163.com.                                                                      |
| 10                  | Any other restrictions?                                                                                                                             | We may balance the potential benefits and risks for each request and then provide the data that could be shared.    |
