# Supplementary material for: Comparison of perioperative outcomes among non-small cell lung cancer patients with neoadjuvant immune checkpoint inhibitor plus chemotherapy, EGFR-TKI, and chemotherapy alone: a real-world evidence study
Source: PubMed Central journal article supplement — Transl Lung Cancer Res. 2022 Jul;11(7):1468–78. doi: 10.21037/tlcr-22-476 (PMC9359956; doi:10.21037/tlcr-22-476), 2022-07
Supplement: tlcr-11-07-1468-supplementary.pdf [file tlcr-11-07-1468-supplementary.pdf]

**Table S1** Comparisons of perioperative outcomes between sleeve lobectomy and pneumonectomy after neoadjuvant treatment

| Variables                                     | Sleeve lobectomy (N=41) | Pneumonectomy (N=14) | P value |
|-----------------------------------------------|-------------------------|----------------------|---------|
| Age (years), mean $\pm$ SD                    | 61.1 $\pm$ 7.1          | 59.9 $\pm$ 6.9       | 0.592   |
| Gender, n (%)                                 |                         |                      | 0.601   |
| Male                                          | 36 (87.8)               | 13 (92.9)            |         |
| Female                                        | 5 (12.2)                | 1 (7.1)              |         |
| Radiologic tumor size (cm), mean $\pm$ SD     |                         |                      |         |
| Before neoadjuvant treatment                  | 4.5 $\pm$ 2.0           | 4.8 $\pm$ 1.7        | 0.708   |
| Before surgery                                | 3.3 $\pm$ 1.8           | 3.4 $\pm$ 1.4        | 0.951   |
| Clinical TNM stage                            |                         |                      | 0.453   |
| I                                             | 3 (7.3)                 | 0 (0)                |         |
| II                                            | 3 (7.3)                 | 2 (14.3)             |         |
| III                                           | 35 (85.4)               | 12 (85.7)            |         |
| Neoadjuvant agents                            |                         |                      | 0.646   |
| ICI plus chemotherapy                         | 14 (34.1)               | 3 (21.4)             |         |
| EGFR-TKI                                      | 6 (14.6)                | 2 (14.3)             |         |
| Chemotherapy alone                            | 21 (51.2)               | 9 (64.3)             |         |
| Surgical approach                             |                         |                      | 0.066   |
| VATS                                          | 29 (70.7)               | 5 (35.7)             |         |
| Thoracotomy                                   | 9 (22.0)                | 7 (50.0)             |         |
| VATS convert to thoracotomy                   | 3 (7.3)                 | 2 (14.3)             |         |
| Number of total examined LNs, mean $\pm$ SD   | 18.3 $\pm$ 7.1          | 17.6 $\pm$ 6.0       | 0.778   |
| Examined N1 nodes                             | 8.5 $\pm$ 4.6           | 7.2 $\pm$ 4.5        | 0.392   |
| Examined N2 nodes                             | 9.8 $\pm$ 5.4           | 10.4 $\pm$ 4.7       | 0.698   |
| Surgical time (minutes), median (IQR)         | 212 (160–240)           | 141 (120–195)        | 0.079   |
| Estimated blood loss (mL), median (IQR)       | 100 (50–200)            | 100 (50–300)         | 0.845   |
| Required for postoperative transfusion, n (%) | 5 (12.2)                | 5 (35.7)             | 0.049   |
| Postoperative stay (days), median (IQR)       | 6 (4–7)                 | 8 (7–12)             | 0.009   |
| Perioperative mortality, n (%)                | 2 (4.9)                 | 1 (7.1)              | 0.747   |
| Postoperative complications, n (%)            |                         |                      |         |
| Any complications                             | 11 (26.8)               | 5 (35.7)             | 0.527   |
| Bronchopleural fistula                        | 2 (4.9)                 | 0 (0)                | 0.400   |
| Hemothorax                                    | 1 (2.4)                 | 0 (0)                | 0.555   |
| Chylothorax                                   | 1 (2.4)                 | 1 (7.1)              | 0.417   |
| Prolonged air leak                            | 2 (4.9)                 | 0 (0)                | 0.400   |
| Pneumonia                                     | 5 (12.2)                | 4 (28.6)             | 0.153   |

SD, standard deviation; TNM, tumor, node, metastasis; ICI, immune checkpoint inhibitor; EGFR-TKI, epidermal growth factor receptor tyrosine kinase inhibitors; VATS, video-assisted thoracoscopic surgery; LN, lymph node; IQR, interquartile range.
